# Supplementary material for: Tumor microRNA profile and prognostic value for lymph node metastasis in oral squamous cell carcinoma patients
Source: PubMed Central journal article supplement (PMC7289532; doi:10.18632/oncotarget.27616), 2020-06-09
Supplement: oncotarget-11-2204-s001.pdf [file oncotarget-11-2204-s001.pdf]

## Tumor microRNA profile and prognostic value for lymph node metastasis in oral squamous cell carcinoma patients

### SUPPLEMENTARY MATERIALS

**Supplementary Table 1: miRNAs significantly associated with nodal disease-free survival by cox-proportional hazard analysis on low or high miRNA expression**

| miRNA name and accession    | cut-point<br>(log <sub>10</sub> RPM) | FDR <sup>a</sup> | Log-rank <i>P</i> <sup>b</sup> | Univariate        |                   | Multivariate with cT stage,<br>tumor grade, DOI |                   |
|-----------------------------|--------------------------------------|------------------|--------------------------------|-------------------|-------------------|-------------------------------------------------|-------------------|
|                             |                                      |                  |                                | HR (95% CI)       | Log-rank <i>P</i> | HR (95% CI)                                     | Log-rank <i>P</i> |
| hsa.mir.106a.MIMAT0000103   | 3.102                                | 0.03711          | 0.00098633                     | 3.4 (1.9–6)       | 2.60E-05          | 2.3 (1.2–4.4)                                   | 1.00E-13          |
| hsa.mir.107.MIMAT0000104    | 6.802                                | 0.00005          | 0.00000015                     | 2.7 (1.6–4.4)     | 1.40E-09          | 8.8e8 (0–Inf)                                   | 9.00E-16          |
| hsa.mir.146b.MIMAT0004766   | 6.224                                | 0.00764          | 0.00010158                     | 1.9 (1.4–2.7)     | 7.80E-05          | 4.1 (1.8–9.5)                                   | 7.00E-14          |
| hsa.mir.181b.1.MIMAT0022692 | 3.264                                | 0.00082          | 0.00000821                     | 1.7 (1.3–2.3)     | 2.50E-07          | 7.2 (2.5–21.3)                                  | 2.00E-14          |
| hsa.mir.200c.MIMAT0000617   | 12.974                               | 0.02905          | 0.00067568                     | 0.29 (0.15–0.53)  | 2.60E-05          | 0.24 (0.13–0.47)                                | 6.00E-16          |
| hsa.mir.203a.MIMAT0000264   | 17.879                               | 0.00778          | 0.00014545                     | 0.12 (0.038–0.39) | 1.60E-06          | 0.11 (0.034–0.39)                               | 1.00E-14          |
| hsa.mir.21.MIMAT0000076     | 17.859                               | 0.00011          | 0.00000073                     | 8 (3.2–20)        | 1.90E-08          | 8.3 (3.2–22)                                    | 6.00E-16          |
| hsa.mir.32.MIMAT0000090     | 4.159                                | 0.00778          | 0.00015514                     | 8.2 (2.5–26)      | 1.60E-06          | 8.7 (2.6–29)                                    | 3.00E-15          |

<sup>a</sup>*P* values were corrected for multiple testing at determining cut-point at false discovery rate (FDR) threshold of 0.05.

<sup>b</sup>*P* values were corrected for multiple testing at determining association with nodal-disease free survival across 301 miRNAs.

Abbreviation(s): RPM, reads per million; HR, hazard ratio; CI, confidence intervals.

**Supplementary Table 2: Patient and baseline clinical-pathological characteristics between low and high score groups in Discovery (training), Discovery (test), and validation cohorts**

|                                                       | miRNA score group based on Penalized Cox PH regression model |                         |                             |             |                         |      |             |                   |      |             |             |       |
|-------------------------------------------------------|--------------------------------------------------------------|-------------------------|-----------------------------|-------------|-------------------------|------|-------------|-------------------|------|-------------|-------------|-------|
|                                                       | Discovery (training) cohort                                  | Discovery (test) cohort | Discovery (training) cohort |             | Discovery (test) cohort |      |             | Validation cohort |      |             |             |       |
|                                                       | (n = 68)                                                     | (n = 23)                | P                           | Low (25)    | High (43)               | P    | Low (13)    | High (10)         | P    | Low (46)    | High (21)   | P     |
| <b>Age, yrs (mean ± SD)</b>                           | 63.7 ± 14.4                                                  | 63.6 ± 15.8             | 0.98                        | 66.7 ± 13.6 | 62.0 ± 14.7             | 0.18 | 58.2 ± 15.8 | 70.7 ± 13.3       | 0.05 | 63.1 ± 13.1 | 58.0 ± 11.7 | 0.12  |
| <b>Sex</b>                                            |                                                              |                         | 1                           |             |                         | 0.16 |             |                   | 0.61 |             |             | 1     |
| Male                                                  | 43 (63)                                                      | 14 (61)                 |                             | 19 (76)     | 24 (56)                 |      | 4 (31)      | 5 (50)            |      | 18 (39)     | 8 (38)      |       |
| Female                                                | 25 (37)                                                      | 9 (39)                  |                             | 6 (24)      | 19 (44)                 |      | 9 (69)      | 5 (50)            |      | 28 (61)     | 13 (62)     |       |
| <b>Smoking History</b>                                |                                                              |                         | 0.92                        |             |                         | 0.73 |             |                   | 0.56 |             |             | 0.41  |
| Never                                                 | 27 (40)                                                      | 9 (39)                  |                             | 11 (44)     | 16 (37)                 |      | 5 (38)      | 4 (40)            |      | 20 (43)     | 12 (57)     |       |
| Ever                                                  | 41 (60)                                                      | 14 (61)                 |                             | 14 (56)     | 27 (63)                 |      | 8 (62)      | 6 (60)            |      | 26 (57)     | 9 (43)      |       |
| <b>Primary tumor site</b>                             |                                                              |                         | 0.83                        |             |                         | 0.53 |             |                   | 1    |             |             | 0.61  |
| Buccal mucosa/Gingiva/<br>Hard Palate                 | 6 (9)                                                        | 3 (13)                  |                             | 1 (4)       | 5 (12)                  |      | 2 (15)      | 1 (10)            |      | 5 (11)      | 2 (10)      |       |
| Soft Palate/Retromolar<br>trigone/Soft Palate Complex | 2 (3)                                                        | 0 (0)                   |                             | 1 (4)       | 1 (2)                   |      |             |                   |      | 2 (4)       | 0 (0)       |       |
| Tongue/Floor of Mouth                                 | 60 (88)                                                      | 20 (87)                 |                             | 23 (92)     | 37 (86)                 |      | 11 (85)     | 9 (90)            |      | 39 (85)     | 19 (90)     |       |
| <b>Clinical T Stage</b>                               |                                                              |                         | 0.75                        |             |                         | 0.82 |             |                   | 0.16 |             |             | 0.54  |
| T1/T2                                                 | 58 (85)                                                      | 19 (83)                 |                             | 21 (84)     | 37 (86)                 |      | 12 (92)     | 7 (70)            |      | 38 (83)     | 16 (76)     |       |
| T3/T4                                                 | 10 (15)                                                      | 4 (17)                  |                             | 4 (16)      | 6 (14)                  |      | 1 (8)       | 3 (30)            |      | 8 (17)      | 5 (24)      |       |
| <b>Clinical N Stage</b>                               |                                                              |                         | 0.56                        |             |                         | 0.86 |             |                   | 0.38 |             |             | 0.69  |
| N0                                                    | 62 (91)                                                      | 20 (87)                 |                             | 23 (92)     | 39 (91)                 |      | 12 (92)     | 8 (80)            |      | 39 (85)     | 17 (81)     |       |
| N+                                                    | 6 (9)                                                        | 3 (13)                  |                             | 2 (8)       | 4 (9)                   |      | 1 (8)       | 2 (20)            |      | 7 (15)      | 4 (19)      |       |
| <b>Tumor Grade</b>                                    |                                                              |                         | 0.62                        |             |                         |      |             |                   | 0.98 |             |             | 0.06  |
| I/II                                                  | 50 (74)                                                      | 15 (65)                 |                             | 8 (32)      | 8 (19)                  |      | 9 (69)      | 6 (60)            |      | 41 (89)     | 14 (67)     |       |
| III                                                   | 18 (26)                                                      | 8 (35)                  |                             | 14 (56)     | 20 (47)                 |      | 4 (31)      | 4 (40)            |      | 5 (11)      | 7 (33)      |       |
| <b>Tumor DOI (mean ± SD)</b>                          | 7.97 ± 7.24                                                  | 7.83 ± 5.30             | 0.92                        | 6.3 ± 8.2   | 8.9 ± 6.6               | 0.19 | 6.3 ± 3.9   | 9.9 ± 6.3         | 0.14 | 4.7 ± 3.5   | 8.3 ± 5.1   | 0.005 |
| <b>Tumor DOI (4 mm cut-off)</b>                       |                                                              |                         | 0.64                        |             |                         | 0.19 |             |                   | 0.79 |             |             | 0.008 |
| < 4 mm                                                | 17 (25)                                                      | 4 (17)                  |                             | 9 (36)      | 8 (19)                  |      | 3 (23)      | 1 (10)            |      | 24 (52)     | 3 (14)      |       |
| ≥ 4 mm                                                | 51 (75)                                                      | 19 (83)                 |                             | 16 (64)     | 35 (81)                 |      | 10 (77)     | 9 (90)            |      | 22 (48)     | 18 (86)     |       |
| <b>Tumor DOI (5 mm cut-off)</b>                       |                                                              |                         | 0.67                        |             |                         | 0.11 |             |                   | 1    |             |             | 0.04  |
| < 5 mm                                                | 23 (34)                                                      | 6 (26)                  |                             | 12 (48)     | 11 (26)                 |      | 3 (23)      | 3 (30)            |      | 27 (59)     | 6 (29)      |       |
| ≥ 5 mm                                                | 45 (66)                                                      | 17 (74)                 |                             | 13 (52)     | 32 (74)                 |      | 10 (77)     | 7 (70)            |      | 19 (41)     | 15 (71)     |       |

Abbreviation(s): DOI, depth of invasion.
